# Supplementary material
Source: ML conference proceedings conference paper supplement (https://openaccess.thecvf.com/content/CVPR_2019/html/Swoboda_MAP_Inference_via_CVPR_2019_paper.html)
Supplement: Supplementary file 1 [file Swoboda_MAP_Inference_via_CVPR_2019_supplemental.pdf]

## A. Proofs

The BLP relaxation [17] introduces a probability distribution  $\mu_i$  over  $\{0, 1\}$  for each  $i \in [d]$  and a probability distribution  $\mu_t$  over  $\text{dom } f_t$  for each  $t \in T$ . It can be written as follows:

$$\begin{aligned} \min_{\mu \geq 0} \quad & \sum_{t \in T} \sum_{z \in \text{dom } f_t} \mu_t(z) f_t(z) \\ \text{s.t.} \quad & \mu_i(0) + \mu_i(1) = 1 \quad \forall i \in [d] \\ & \sum_{z \in \text{dom } f_t} \mu_t(z) = 1 \quad \forall t \in T \\ & \sum_{z \in \text{dom } f_t: z_i = a} \mu_t(z) = \mu_i(a) \quad \forall t \in T, i \in A_t, a \in \{0, 1\} \end{aligned} \quad (19)$$

Let us show that the optimal values of (19) and (3) coincide.

*Proof of equivalence of (19) and (3).* Define an extension  $\hat{f}_t : \mathbb{R}^{A_t} \rightarrow \mathbb{R} \cup \{+\infty\}$  of function  $f_t : \{0, 1\}^{A_t} \rightarrow \mathbb{R} \cup \{+\infty\}$  as follows: for a vector  $x \in \mathbb{R}^{A_t}$  set

$$\begin{aligned} \hat{f}_t(x) = \min_{\mu \geq 0} \quad & \sum_{z \in \text{dom } f_t} \mu_t(z) f_t(z) \\ \text{s.t.} \quad & \sum_{z \in \text{dom } f_t} \mu_t(z) = 1 \\ & \sum_{z \in \text{dom } f_t} \mu_t(z) \cdot z = x \end{aligned} \quad (20)$$

Note, if  $x \notin [0, 1]^{A_t}$  then (20) does not have a feasible solution, and so  $\hat{f}_t(x) = +\infty$ . Observe that the constraints in the last line of (19) for  $a = 0$  are redundant - they follow from the remaining constraints. Also observe that constraints  $\sum_{z \in \text{dom } f_t: z_i = 1} \mu_t(z) = \mu_i(1)$  for  $i \in A_t$  can be written as  $\sum_{z \in \text{dom } f_t} \mu_t(z) \cdot z = x$  if we denote  $x_i = \mu_i(1)$  for  $i \in A_t$ . Therefore, problem (19) can be equivalently rewritten as follows:

$$\min_{x \in \mathbb{R}^d} \sum_{t \in T} \hat{f}_t(x_{A_t}) \quad (21)$$

It can be seen that the last problem is equivalent to (3). Indeed, we just need to observe that for each  $t \in T$  and  $x \in \mathbb{R}^{A_t}$  we have

$$\begin{aligned} \min_{\substack{y \in \text{conv}(\mathcal{Y}_t) \\ y_* = x}} y_o &= \min_{\substack{\alpha \geq 0, \sum_{z \in \text{dom } f_t} \alpha(z) = 1 \\ y = \sum_{z \in \text{dom } f_t} \alpha(z) \cdot [z \ f(z)] \\ y_* = x}} y_o \\ &= \min_{\substack{\alpha \geq 0, \sum_{z \in \text{dom } f_t} \alpha(z) = 1 \\ \sum_{z \in \text{dom } f_t} \alpha(z) \cdot z = x}} \sum_{z \in \text{dom } f_t} \alpha(z) f(z) = \hat{f}_t(x) \end{aligned} \quad \square$$

*Proof of Proposition 1.* Write  $f(y) := \sum_{t \in T} y_o^t$ , then problem (3) can be written as

$$\min_{\substack{(y, x) \in \mathbb{Y} \times \mathbb{R}^d \\ y_*^t = x_{A_t} \quad \forall t \in T}} f(y) \quad (22)$$

The Lagrangian w.r.t. the equality constraints is given by

$$\begin{aligned} L(y, x, \lambda) &= f(y) + \sum_{t \in T} \langle y_*^t - x_{A_t}, \lambda^t \rangle \\ &= \sum_{t \in T} \langle y^t, [\lambda^t \ 1] \rangle - \sum_{t \in T} \langle x_{A_t}, \lambda^t \rangle \end{aligned}$$

Therefore, the dual function for  $\lambda \in \bigotimes_{t \in T} \mathbb{R}^{A_t}$  is

$$\begin{aligned} h(\lambda) &= \min_{(y, x) \in \mathbb{Y} \times \mathbb{R}^d} L(y, x, \lambda) \\ &= \begin{cases} \sum_{t \in T} \min_{y^t \in \mathbb{Y}_t} \langle y^t, [\lambda^t \ 1] \rangle & \text{if } \lambda \in \Lambda \\ -\infty & \text{otherwise} \end{cases} \end{aligned}$$

The problem can thus be formulated as  $\max_{\lambda} h(\lambda)$ , or equivalently as  $\max_{\lambda \in \Lambda} h(\lambda)$ . This coincides with formulation given in Proposition 1.

Since constraint  $y \in \mathbb{Y}$  can be expressed as a linear program, the duality between (3) and (5) can be viewed as a special case of linear programming (LP) duality (where the value of function  $h(\lambda)$  is also written as a resulting of some LP). For LPs it is known that strong duality holds assuming that either the primal or the dual problems have a feasible solution. This holds in our case, since vector  $\lambda = \mathbf{0} \in \Lambda$  is feasible. We can conclude that we have a strong duality between (3) and (5).  $\square$

*Proof of Proposition 2.* First, we derive the dual of  $h_{\mu, c}$ :

$$\begin{aligned} \max_{\lambda \in \Lambda} h_{\mu, c}(\lambda) &= \max_{\lambda \in \Lambda} \sum_{t \in T} \min_{y^t \in \mathbb{Y}_t} \langle y^t, [\lambda^t \ 1] \rangle - \frac{1}{2c} \|\lambda^t - \mu^t\|^2 \\ &= \min_{y \in \mathbb{Y}} \max_{\lambda \in \Lambda} \underbrace{\sum_{t \in T} \langle y^t, [\lambda^t \ 1] \rangle - \frac{1}{2c} \|\lambda^t - \mu^t\|^2}_{=: f_{\mu, c}(y)} \end{aligned}$$

The function  $f_{\mu, c}(y)$  has a closed form expression, since it is a quadratic function subject to linear equalities. Write  $\nu_i = \frac{1}{|T_i|} \sum_{t \in T_i} (c \cdot y_i^t + \mu_i^t)$  for  $i \in [d]$ . The arg max in the expression defining  $f_{\mu, c}(y)$  are

$$\lambda^t = (c \cdot y_*^t + \mu^t) - \nu_{A_t} \quad (23)$$

The function value is

$$\begin{aligned} f_{\mu, c}(x) &= \sum_{t \in T} \langle y^t, [\lambda_*^t \ 1] \rangle - \frac{1}{2c} \|\lambda_*^t - \mu^t\|^2 \\ &= \sum_{t \in T} \left( \langle y_*^t, c \cdot y_*^t + \mu^t - \nu_{A_t} \rangle + y_o^t - \frac{1}{2c} \|c y_*^t + \mu^t - \nu_{A_t} - \mu^t\|^2 \right) \\ &= \sum_{t \in T} \left( c \|y_*^t\|^2 + \langle y_*^t, \mu^t - \nu_{A_t} \rangle + y_o^t - \frac{1}{2c} \|c y_*^t - \nu_{A_t}\|^2 \right) \\ &= \sum_{t \in T} \left( c \|y_*^t\|^2 + \langle y_*^t, \mu^t - \nu_{A_t} \rangle + y_o^t - \frac{1}{2c} \{ \|c y_*^t\|^2 - 2c \langle y_*^t, \nu_{A_t} \rangle + \|\nu_{A_t}\|^2 \} \right) \\ &= \sum_{t \in T} \left( \frac{c}{2} \|y_*^t\|^2 + \langle y_*^t, \mu^t \rangle + y_o^t - \frac{1}{2c} \|\nu_{A_t}\|^2 \right). \end{aligned}$$

The gradient is  $\nabla_t f_{\mu,c}(y) = [c \cdot y^t + \mu^t - \nu_{A_t} \mathbf{1}] = [\lambda^t \mathbf{1}]$ .  $\square$

*Proof of Proposition 3.* Let  $\overline{\mathbb{Y} \times \mathbb{R}^d}$  be the set of vectors  $(y, x) \in \mathbb{Y} \times \mathbb{R}^d$  satisfying the equality constraints  $y_\star^t = x_{A_t}$  for all  $t$ . By construction, for any  $\lambda \in \Lambda$  we have

$$f(y) = L(y, x, \lambda) \quad \forall (y, x) \in \overline{\mathbb{Y} \times \mathbb{R}^d} \quad (24a)$$

$$L(y, x, \lambda) \geq h(\lambda) \quad \forall (y, x) \in \overline{\mathbb{Y} \times \mathbb{R}^d} \quad (24b)$$

$$L(y, x, \lambda) = \sum_{t \in T} \langle y^t, [\lambda^t \mathbf{1}] \rangle \quad (24c)$$

Eq. (24c) gives that  $A_{y,\lambda} = L(y, x, \lambda) - h(\lambda)$  for any  $(y, \lambda) \in \overline{\mathbb{Y} \times \Lambda}$  and  $x \in \mathbb{R}^d$ , and so from (24b) we get that  $A_{y,\lambda} \geq 0$ . Clearly, we have  $B_y \geq 0$ . The following two facts imply part (b) of Proposition 3:

- Consider vector  $y \in \mathbb{Y}$ . Then  $B_y = 0$  if and only if  $(y, x) \in \overline{\mathbb{Y} \times \mathbb{R}^d}$  for some  $x$ . (This can be seen from the definition of  $B_y$  in Section 2.3).
- Consider vectors  $(y, x) \in \overline{\mathbb{Y} \times \mathbb{R}^d}$  and  $\lambda \in \Lambda$ . They are an optimal primal-dual pair if and only if  $f(y) = h(\lambda)$ , which in turn holds if and only if  $A_{y,\lambda} = 0$  (since  $A_{y,\lambda} = L(y, x, \lambda) - h(\lambda) = f(y) - h(\lambda)$ ).

It remains to show inequality (11). Denote  $\delta = \lambda^* - \lambda$ , then  $\sum_{t \in T_i} \delta_i^t = 0$  for any  $i \in [d]$ . Denoting  $y_i^- = \min_{t \in T_i} y_i^t$  and  $y_i^+ = \max_{t \in T_i} y_i^t$ , we get

$$\begin{aligned} \sum_{t \in T_i} y_i^t \cdot \delta_i^t &= \sum_{t \in T_i} [y_i^t - y_i^-] \cdot \delta_i^t \\ &\leq \sum_{t \in T_i} [y_i^+ - y_i^-] \cdot |\delta_i^t| \\ &\leq [y_i^+ - y_i^-] \cdot \|\delta\|_{1,\infty} \end{aligned}$$

Summing these inequalities over  $i \in [d]$  gives

$$\sum_{t \in T} \langle y_\star^t, \delta^t \rangle \leq B_y \cdot \|\delta\|_{1,\infty}$$

Recalling that  $A_{\lambda^*,y} \geq 0$ , we obtain the desired claim:

$$\begin{aligned} h(\lambda^*) &\leq \sum_{t \in T} \langle y^t, [(\lambda^*)^t \mathbf{1}] \rangle \\ &= \sum_{t \in T} \langle y^t, [\lambda^t \mathbf{1}] \rangle + \sum_{t \in T} \langle y_\star^t, \delta^t \rangle \\ &\leq \sum_{t \in T} \langle y^t, [\lambda^t \mathbf{1}] \rangle + B_y \cdot \|\delta\|_{1,\infty} \end{aligned}$$

$\square$

**Lemma 1** (step size in Algorithm 1). *The optimal step size  $\gamma$  in Algorithm 1 is*

$$\gamma = \frac{\langle \nabla_t f_{\mu,c}(y), y^t - z^t \rangle}{c \|y_\star^t - z_\star^t\|^2} = \frac{\langle [c \cdot y_\star^t + \mu^t - \nu_{A_t} \mathbf{1}], y^t - z^t \rangle}{c \|y_\star^t - z_\star^t\|^2} \quad (25)$$

and clip  $\gamma$  to  $[0, 1]$ .

*Proof.* Recall that  $y(\gamma)$  in algorithm 1 is defined as  $y(\gamma)^s = \begin{cases} y^s, & s \neq t \\ (1 - \gamma)y^t + \gamma z^t, & s = t \end{cases}$ . The derivative  $f_{\mu,c}(y(\gamma))' = \langle \nabla f_{\mu,c}(y(\gamma)), y(\gamma)' \rangle$  is hence zero except in the  $t$ -th place. Thus,

$$\begin{aligned} &f_{\mu,c}(x(\gamma))' \\ &= \langle \nabla_t f_{\mu,c}(y), -y^t + z^t \rangle \\ &= \langle [c \cdot y_\star^t(\gamma) + \mu^t - \nu_{A_t} \mathbf{1}], -y^t + z^t \rangle \\ &= \langle [c \cdot y_\star^t + \mu^t - \nu_{A_t} \mathbf{1}], -y^t + z^t \rangle \\ &\quad + \gamma \langle c \cdot (-y_\star^t + z_\star^t), -y_\star^t + z_\star^t \rangle \end{aligned} \quad (26)$$

Setting the above derivative zero yields

$$\gamma = \frac{\langle [c \cdot y_\star^t + \mu^t - \nu_{A_t} \mathbf{1}], y^t - z^t \rangle}{c \|y_\star^t - z_\star^t\|^2}.$$

Recalling that we require  $\gamma \in [0, 1]$ , we get the desired formula.  $\square$

## B. Detailed experimental evaluation

In Table 2 we give the final lower bound obtained by each tested algorithm for every instance of every dataset we evaluated on. The averaged numbers are given in Table 1.

Table 2: Lower bound of each instance. † means method not applicable. **Bold** numbers indicate highest lower bound among competing methods.

| Instance                   | FWMAP            | CB            | SA        | MP        |
|----------------------------|------------------|---------------|-----------|-----------|
| <u>MRF</u>                 |                  |               |           |           |
| <b>protein folding</b>     |                  |               |           |           |
| 1CKK                       | <b>-12840.23</b> | -12857.29     | -12945.39 | -12924.97 |
| 1CM1                       | <b>-12486.15</b> | -12499.21     | -12591.23 | -12488.10 |
| 1SY9                       | <b>-9193.38</b>  | -9196.14      | -9293.58  | -9194.77  |
| 2BBN                       | <b>-12396.51</b> | -12461.89     | -12585.85 | -12417.20 |
| 2BCX                       | <b>-14043.57</b> | -14144.89     | -14231.86 | -14112.73 |
| 2BE6                       | <b>-13311.78</b> | -13381.35     | -13410.24 | -13438.23 |
| 2F3Y                       | <b>-14572.71</b> | -14619.70     | -14672.71 | -14641.60 |
| 2FOT                       | <b>-12049.52</b> | -12112.31     | -12154.66 | -12103.75 |
| 2HQW                       | <b>-13514.79</b> | -13573.99     | -13610.14 | -13539.69 |
| 2O60                       | <b>-13557.32</b> | -13664.00     | -13718.71 | -13565.42 |
| 3BXL                       | <b>-14125.86</b> | -14165.97     | -14266.01 | -14136.79 |
| <u>Discrete tomography</u> |                  |               |           |           |
| <b>2 projections</b>       |                  |               |           |           |
| 0.10_0.10_2                | <b>97.99</b>     | 97.94         | 96.46     | †         |
| 0.20_0.20_2                | <b>226.81</b>    | 226.66        | 222.05    | †         |
| 0.30_0.30_2                | <b>205.65</b>    | 205.25        | 194.49    | †         |
| 0.40_0.40_2                | <b>271.23</b>    | 270.99        | 253.94    | †         |
| 0.50_0.48_87               | <b>340.13</b>    | 339.98        | 315.41    | †         |
| 0.60_0.58_28               | <b>313.19</b>    | 312.80        | 288.73    | †         |
| 0.70_0.67_47               | <b>287.11</b>    | 286.83        | 246.04    | †         |
| 0.80_0.76_72               | <b>338.97</b>    | 338.78        | 290.73    | †         |
| 0.90_0.85_63               | <b>313.98</b>    | 313.77        | 246.63    | †         |
| <b>4 projections</b>       |                  |               |           |           |
| 0.10_0.10_2                | <b>102.00</b>    | 101.55        | 99.50     | †         |
| 0.20_0.20_2                | <b>250.61</b>    | 250.02        | 245.30    | †         |
| 0.30_0.30_2                | <b>247.86</b>    | 246.44        | 233.65    | †         |
| 0.40_0.40_2                | <b>365.05</b>    | 364.00        | 346.89    | †         |
| 0.50_0.48_87               | <b>439.60</b>    | 435.50        | 412.32    | †         |
| 0.60_0.58_28               | <b>400.91</b>    | 400.05        | 368.05    | †         |
| 0.70_0.67_47               | <b>393.88</b>    | 392.57        | 371.80    | †         |
| 0.80_0.76_72               | <b>443.87</b>    | 440.91        | 413.42    | †         |
| 0.90_0.85_63               | <b>397.14</b>    | 395.93        | 358.60    | †         |
| <b>6 projections</b>       |                  |               |           |           |
| 0.10_0.10_2                | <b>102.00</b>    | <b>102.00</b> | 101.82    | †         |
| 0.20_0.20_2                | <b>256.00</b>    | 255.85        | 254.74    | †         |
| 0.30_0.30_2                | <b>295.85</b>    | 292.28        | 272.74    | †         |
| 0.40_0.40_2                | <b>461.27</b>    | 456.70        | 433.89    | †         |
| 0.50_0.48_87               | <b>533.95</b>    | 526.86        | 494.29    | †         |
| 0.60_0.58_28               | <b>514.05</b>    | 507.34        | 474.61    | †         |
| 0.70_0.67_47               | <b>577.38</b>    | 566.15        | 530.47    | †         |
| 0.80_0.76_72               | <b>542.96</b>    | 534.01        | 488.62    | †         |
| 0.90_0.85_63               | <b>535.78</b>    | 518.67        | 468.60    | †         |
| <b>sheep logan 64x64</b>   |                  |               |           |           |
| Logan_64_2                 | <b>582.52</b>    | 541.62        | 392.47    | †         |
| Logan_64_4                 | <b>871.58</b>    | 831.63        | 702.32    | †         |

Table 2: Lower bound of each instance. † means method not applicable. **Bold** numbers indicate highest lower bound among competing methods.

| Instance                   | FWMAP           | CB       | SA       | MP              |
|----------------------------|-----------------|----------|----------|-----------------|
| Logan_64_6                 | <b>1237.44</b>  | 1170.36  | 1011.00  | †               |
| <b>sheep logan 256x256</b> |                 |          |          |                 |
| Logan_256_2                | <b>3709.46</b>  | 3505.46  | 2599.41  | †               |
| Logan_256_4                | <b>4888.25</b>  | 4739.40  | 976.29   | †               |
| Logan_256_6                | <b>5142.48</b>  | 4832.85  | -2463.81 | †               |
| Graph matching             |                 |          |          |                 |
| <b>6d scene flow</b>       |                 |          |          |                 |
| board                      | <b>-2262.66</b> | -2262.66 | -2262.89 | <b>-2262.66</b> |
| books                      | <b>-4179.79</b> | -4186.16 | -4191.30 | -4204.14        |
| hammer                     | <b>-2125.87</b> | -2127.66 | -2130.58 | -2146.81        |
| party                      | <b>-3648.03</b> | -3648.71 | -3649.41 | -3657.12        |
| table                      | <b>-3340.59</b> | -3341.12 | -3343.81 | -3363.98        |
| walking                    | <b>-1627.30</b> | -1627.34 | -1627.58 | -1627.79        |
